# Supplementary material for: LMM24 Encodes Receptor-Like Cytoplasmic Kinase 109, Which Regulates Cell Death and Defense Responses in Rice
Source: PubMed Central journal article supplement (PMC6651581; doi:10.3390/ijms20133243), 2019-07-02
Supplement: ijms-20-03243-s001.pdf [file ijms-20-03243-s001.pdf]

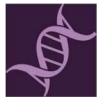

**Table S1.** Genetic analysis of mutant *lmm24*.

| Hybrid Combination    | No. of Wild-Type | No. of Mutant | $\chi^2_{0.05} = 3.841$ . |
|-----------------------|------------------|---------------|---------------------------|
| ZH8015 × <i>lmm24</i> | 610              | 206           | 0.026                     |

**Table S2.** Primer used in this study for PCR.

| Primer    | Forward Primer (5' → 3') | Reverse Primer (5' → 3') | Length of PCR Product |
|-----------|--------------------------|--------------------------|-----------------------|
| LMM24     | ATGCCGCCGAGGCAGTGG       | TCAGGGCAGCTTGGCGGA       | 1344 bp               |
| P-LMM24   | TGTGGTCGCTTACTTCGC       | TCTCTAAACATTCGCTCTACAAA  | 5192 bp               |
| GFP-F/R   | ATGCCGCCGAGGCAGTGGAG     | GGCAGCTTGGCGGAGGCCG      | 1341 bp               |
| 4th Exons | GCCTCCAACATCCTCCTCG      | TACTCGCGATGACGTGGC       | 735 bp                |

**Table S3.** Summary of sequencing data quality.

| Sample  | Raw Base(bp) | Clean Base(bp) | Effective Rate (%) | Error Rate (%) |
|---------|--------------|----------------|--------------------|----------------|
| pool-WT | 6761109300   | 6754383300     | 99.91              | 0.04           |
| pool-M  | 22194976200  | 22155026400    | 99.82              | 0.04           |

**Table S4.** Sequencing depth and coverage statistics.

| Sample  | Mapped Reads | Total Reads | Mapping Rate (%) | Average Depth (×) |
|---------|--------------|-------------|------------------|-------------------|
| pool-WT | 43990838     | 45031222    | 97.69            | 16.1              |
| pool-M  | 144426427    | 147700176   | 97.78            | 50.98             |

**Table S5.** Primer used in this study for gene expression level analysis.

| Primer           | Forward Primer (5' → 3')    | Reverse Primer (5' → 3') |
|------------------|-----------------------------|--------------------------|
| <i>PR1a</i>      | GGCCAATCTCCCTACTGATTAA      | GCATAAACACGTAGCATAGCAT   |
| <i>PBZ1</i>      | GGTGTGGGAAGCACATACAA        | GTCTCCGTCCGAGTGTGACTTG   |
| <i>PR1b</i>      | TACGCCAGCCAGAGGAGC          | GCCGAACCCCAGAAAGAGG      |
| <i>PAL1</i>      | TTCAACGCCGACACCT            | GTAGAGCGGATACGACCTG      |
| <i>AOS2</i>      | AAGCTGCTGCAATACGTGTACTGG    | CGACGAGCAACAGCCCTCCG     |
| <i>WRKY45</i>    | GCCGACGACCAGCACGATCACC      | ACGAGCCGACGCCGCCCTC      |
| <i>psaB</i>      | TTGGTATGCTACCGCACAT         | CCGGACGTCCATAGAAAAGAT    |
| <i>psbA</i>      | AAGTTTCTCTGATGGTATG         | ATAGCACTGAATAGGGAA       |
| <i>psbB</i>      | TCATATTGCTGCGGGTACAT        | AGTTGCTGACCCATAACCACA    |
| <i>psbC</i>      | TACAACCTTGCCAAGAACGA        | TACGCCACCCACAGAATTTA     |
| <i>cab2R</i>     | GTTCTCCATGTTCCGGCTTCT       | GACGAAGTTGGTGGCGTAG      |
| <i>rpoA</i>      | TCAGGGAATTCACCATGCTA        | ATCAAATTTGGTCAGGGTGGT    |
| <i>CHL1</i>      | AGTAACCTTGGTGCTGTG          | AATCCATCAACATTCAACTCTG   |
| <i>CHLD</i>      | GGAAAGAGAGGGCATTAG          | CAATACGATCAAGTAAGTGT     |
| <i>SGR</i>       | GCAATGTCGCCAAATGACG         | GCTCACCACTCATCCCTAAAG    |
| <i>Osl2</i>      | GCAGACAACAATCGCCAAAT        | TCTCCAGCAACTCTAACCAGCAT  |
| <i>Osl30</i>     | AACCTTTTTCTTGGAGATGATACAA   | CTTGAAGTGTAGGGGCTTGCTT   |
| <i>Osl43</i>     | TGTGACAAGTGCTAATAATACATACGA | CCAGACCTTCCAAAGAATCCAAC  |
| <i>Osl85</i>     | TCCAGGATGTGATGAGGATTATTC    | GCGTGCTGTAGTTCAGTCTGTAAG |
| <i>β-actin1</i>  | CAGGCCGTCCTCTCTGTGA         | AAGGATAGCATGGGGGAGAG     |
| <i>Ubiquitin</i> | GCTCCGTGGCGGTATCAT          | CGGCAGTTGACAGCCCTAG      |

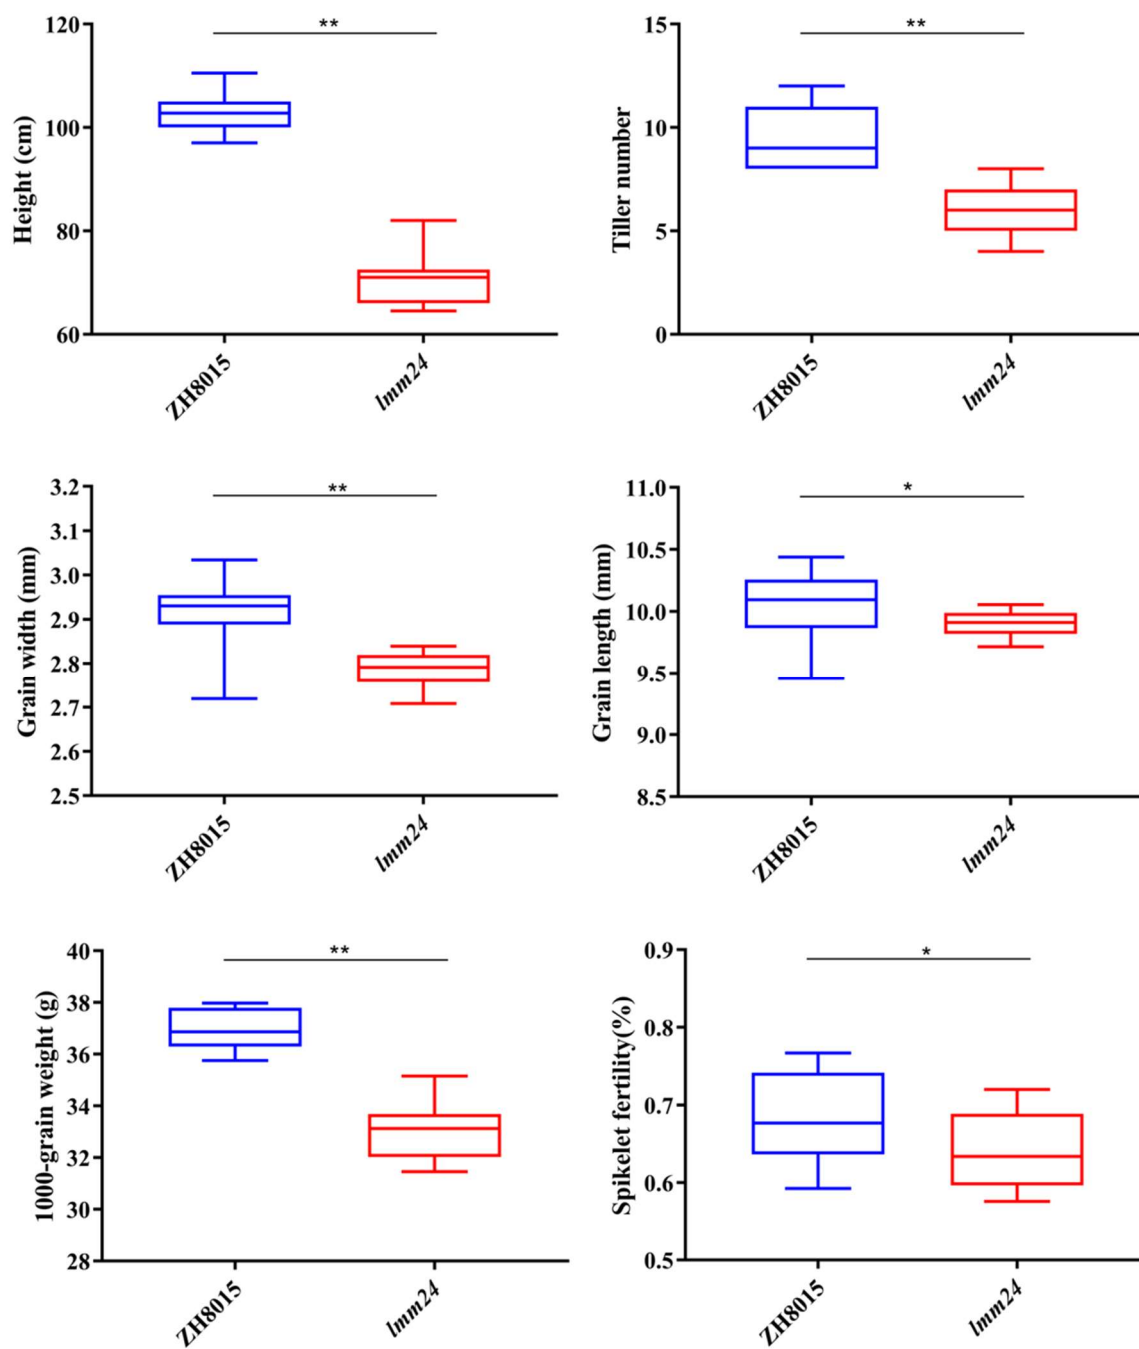

**Figure S1.** Trait measurements of ZH8015 and *lmm24*. Boxes represent the median values and the first and third quartiles; Whiskers represent the minimum and maximum values.  $n = 20$ . (Student's  $t$ -test, \*,  $p < 0.05$ . \*\*,  $p < 0.01$ ).

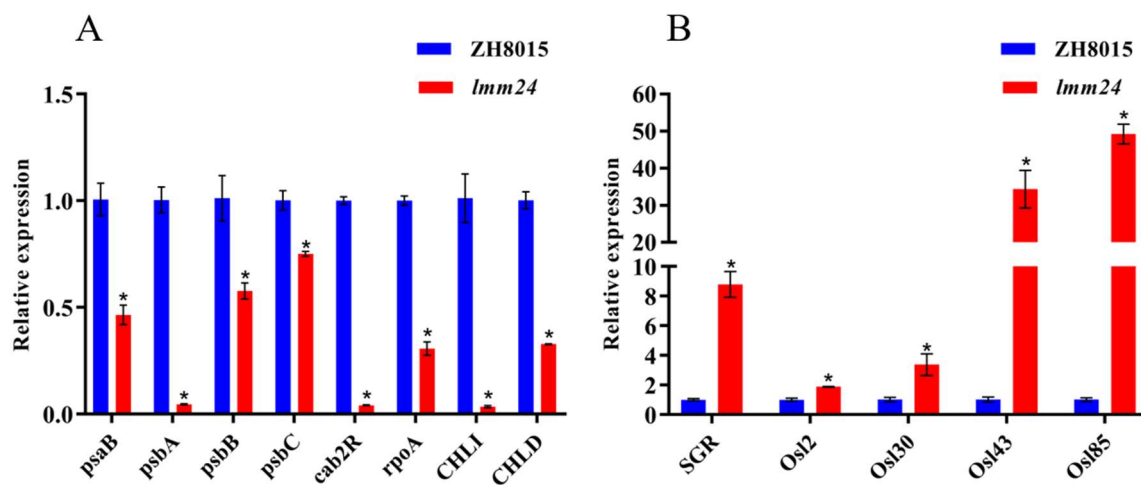

**Figure S2.** Analysis of expression levels of photosynthesis-related and senescence-related genes, *Ubiquitin* as a reference gene. (A) Expression levels of photosynthesis-related genes. (B) Expression levels of SGR gene and senescence-associated genes. The expression level of each gene in ZH8015 was normalized to 1. Data are means  $\pm$  SE of three biological replicates. The P value is calculated by the Mann-Whitney U test method. \* $p < 0.01$ .

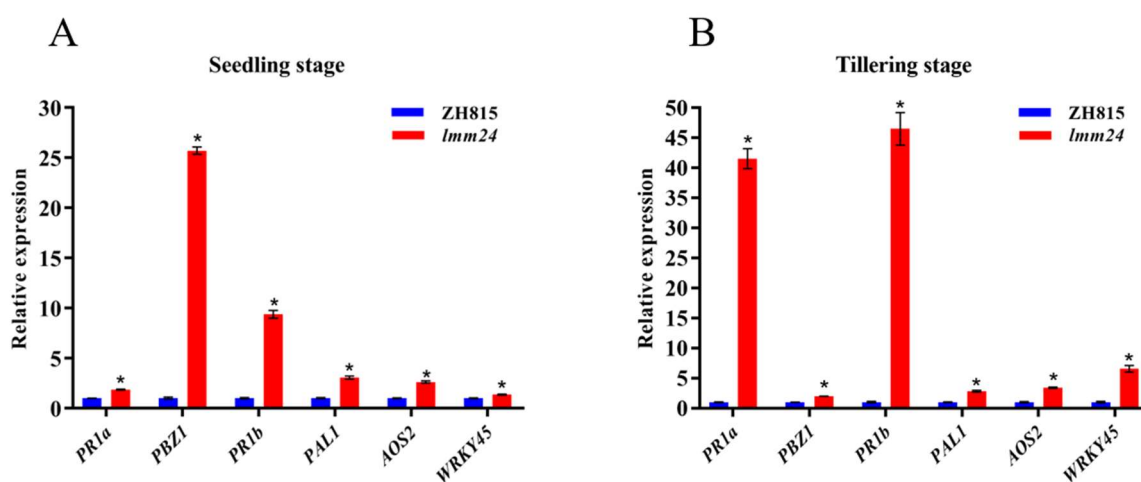

**Figure S3.** Expression levels of PR genes, *Ubiquitin* as a reference gene. (A) Seedling stage (20 dps) (B) Tillering stage (50 dps). The expression level of each gene in ZH8015 was normalized to 1. Data are means  $\pm$  SE of three biological replicates. The P value is calculated by the Mann-Whitney U test method. \* $p < 0.01$ .

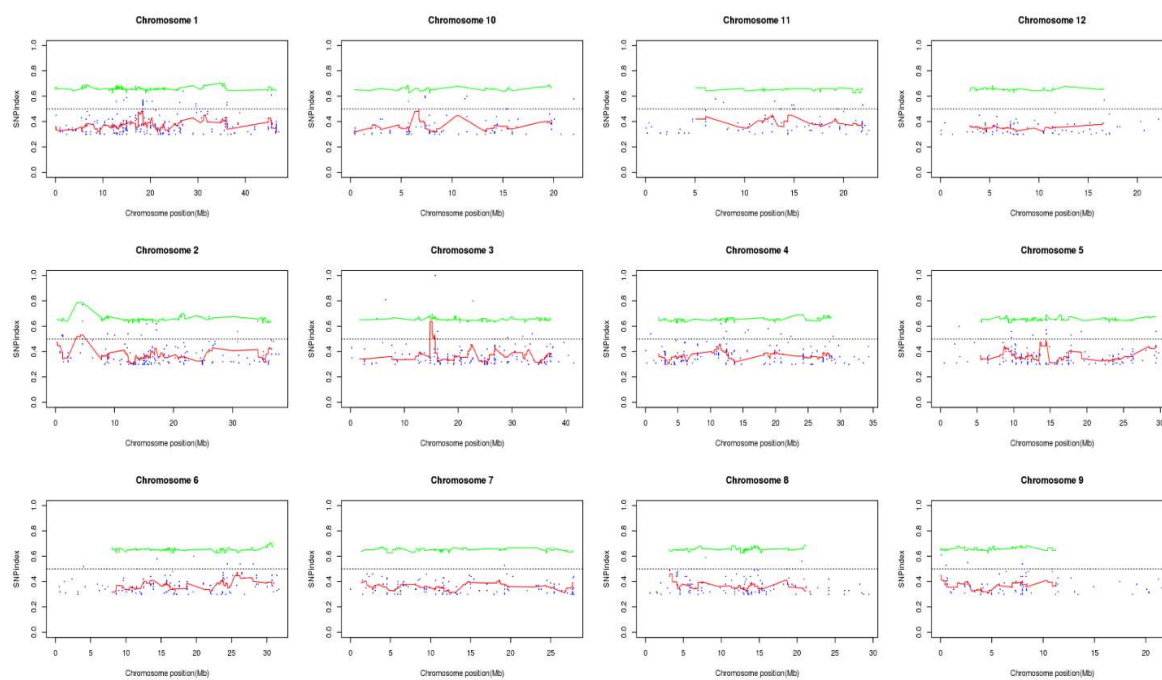

**Figure S4.** SNP index Manhattan plot of 12 chromosomes in rice. In the Manhattan plot, the X-axis represents the chromosome position, and the Y-axis represents the value of the SNP-index. Each point in the graph represents the position of each candidate site and the value of the SNP-index. The red line indicates the average of the SNP-index of all SNPs in each window. Select 1Mb as the window and 1kb as the step size to calculate the average value of SNP-index in each window.
